# Supplementary material for: Iroquois homeobox gene 2 as a novel prognostic marker that dysregulated in lung adenocarcinoma
Source: Research Square preprint supplement (doi:10.21203/rs.3.rs-1650352/v1), 2022-05-20
Supplement: Supplementary file 1 [file 2ec6fdf4e13c3ac4e86b6cf9.xlsx]

## Sheet: Sheet1
Dataset	GEO ID/Source	Normal	Tumor	Platform	Protein-coding homoebox gene detected	Up DEGs	Down DEGs
TCGA_LUAD_2016	TCGA-LUAD	517	59	Illumina HiSeq 2000 RNA	227	95	35
Sanchez-Palencia_2011	GSE18842	45	46	GPL570	205	42	24
Hou_2010	GSE19188	65	91	GPL570	205	35	22
Selamat_2012	GSE32863	58	58	GPL6884	225	22	21
Seo_2012	GSE40419	77	87	GPL11154	230	29	30
